# Supplementary material for: Simulation of Organic Liquid Product Deoxygenation through Multistage Countercurrent Absorber/Stripping Using CO2 as Solvent with Aspen-HYSYS: Process Modeling and Simulation
Source: MDPI journal article supplement (doi:10.3390/molecules27072211), 2022-03-29
Supplement: s1 [file s1]

| <b>ABSORBER T-100, (S/F) = 17</b>                     |               |                       |               |               | <b>CO<sub>2</sub> (Free-Basis)</b>                           | <b>CO<sub>2</sub> (Free-Basis)</b>                             |
|-------------------------------------------------------|---------------|-----------------------|---------------|---------------|--------------------------------------------------------------|----------------------------------------------------------------|
| Streams                                               | <b>PLO</b>    | <b>CO<sub>2</sub></b> | <b>1</b>      | <b>2</b>      | <b>Extract</b>                                               | <b>Raffinate</b>                                               |
| Gas fraction                                          | 0.0000        | 1.0000                | 1.0000        | 0.0000        |                                                              |                                                                |
| <b>Temperature [C]</b>                                | <b>60.0</b>   | 60.0                  | 148.0         | 80.1          |                                                              |                                                                |
| <b>Pressure [bar]</b>                                 | <b>140</b>    | 140                   | 140           | 140           |                                                              |                                                                |
| Molar Flow [kgmole/h]                                 | 0.52          | 38.42                 | 20.06         | 18.89         |                                                              |                                                                |
| Mass Flow [kg/h]                                      | 100.00        | 1691.00               | 910.06        | 880.94        | <b>36.65</b>                                                 | <b>63.35</b>                                                   |
| <b>Composition of OLP<br/>(Mass Fraction)</b>         |               |                       |               |               |                                                              |                                                                |
| Carbon-Dioxide                                        | 0.0000        | 1                     | 0.9597        | 0.9281        | 0.0000                                                       | 0.0000                                                         |
| n-Undecane                                            | 0.0641        | 0                     | 0.0046        | 0.0026        | 0.1130                                                       | 0.0358                                                         |
| n-Dodecane                                            | 0.0315        | 0                     | 0.0020        | 0.0016        | 0.0485                                                       | 0.0216                                                         |
| n-Tridecane                                           | 0.0526        | 0                     | 0.0025        | 0.0034        | 0.0627                                                       | 0.0467                                                         |
| n-Tetradecane                                         | 0.0925        | 0                     | 0.0029        | 0.0075        | 0.0724                                                       | 0.1041                                                         |
| n-Pentadecane                                         | 0.1259        | 0                     | 0.0028        | 0.0114        | 0.0705                                                       | 0.1580                                                         |
| n-Hexadecane                                          | 0.0274        | 0                     | 0.0007        | 0.0024        | 0.0171                                                       | 0.0333                                                         |
| n-Heptadecane                                         | 0.0132        | 0                     | 0.0002        | 0.0013        | 0.0055                                                       | 0.0177                                                         |
| n-Octadecane                                          | 0.0121        | 0                     | 0.0001        | 0.0013        | 0.0017                                                       | 0.0181                                                         |
| 1-Decene                                              | 0.0469        | 0                     | 0.0047        | 0.0005        | 0.1157                                                       | 0.0071                                                         |
| cis-2-Decene                                          | 0.0047        | 0                     | 0.0005        | 0.0001        | 0.0113                                                       | 0.0009                                                         |
| 1-Dodecene                                            | 0.0985        | 0                     | 0.0064        | 0.0046        | 0.1583                                                       | 0.0639                                                         |
| trans-2-Dodecene                                      | 0.0038        | 0                     | 0.0002        | 0.0002        | 0.0057                                                       | 0.0027                                                         |
| 1-Tridecene                                           | 0.0019        | 0                     | 0.0001        | 0.0001        | 0.0024                                                       | 0.0016                                                         |
| 1-Tetradecene                                         | 0.0052        | 0                     | 0.0002        | 0.0004        | 0.0050                                                       | 0.0053                                                         |
| (E)-9-Octadecene                                      | 0.0061        | 0                     | 0.0001        | 0.0006        | 0.0018                                                       | 0.0086                                                         |
| 1-Pentadecene                                         | 0.0043        | 0                     | 0.0001        | 0.0004        | 0.0031                                                       | 0.0050                                                         |
| 1-Heptadecene                                         | 0.0331        | 0                     | 0.0006        | 0.0032        | 0.0142                                                       | 0.0440                                                         |
| 1-Nonadecene                                          | 0.0082        | 0                     | 0.0001        | 0.0008        | 0.0021                                                       | 0.0117                                                         |
| 1,4-Undecadiene                                       | 0.0056        | 0                     | 0.0005        | 0.0002        | 0.0113                                                       | 0.0023                                                         |
| 5-Icosene                                             | 0.0008        | 0                     | 0.0000        | 0.0001        | 0.0002                                                       | 0.0011                                                         |
| Isobutylcyclohexane                                   | 0.0059        | 0                     | 0.0006        | 0.0001        | 0.0145                                                       | 0.0009                                                         |
| n-Butylcyclohexane                                    | 0.0038        | 0                     | 0.0003        | 0.0001        | 0.0087                                                       | 0.0010                                                         |
| Cyclododecane                                         | 0.0048        | 0                     | 0.0002        | 0.0003        | 0.0051                                                       | 0.0046                                                         |
| n-Decylcyclopentane                                   | 0.0594        | 0                     | 0.0015        | 0.0052        | 0.0364                                                       | 0.0727                                                         |
| n-Nonylcyclopentane                                   | 0.0364        | 0                     | 0.0012        | 0.0029        | 0.0293                                                       | 0.0405                                                         |
| n-Nonylcyclohexane                                    | 0.0517        | 0                     | 0.0012        | 0.0046        | 0.0307                                                       | 0.0638                                                         |
| 1-Ethyl-2 heptylcyclopropane                          | 0.0048        | 0                     | 0.0003        | 0.0002        | 0.0076                                                       | 0.0032                                                         |
| 1-Pentyl-2-propylcyclopropane                         | 0.0197        | 0                     | 0.0016        | 0.0006        | 0.0389                                                       | 0.0086                                                         |
| 1-Butyl-1-cyclohexene                                 | 0.0072        | 0                     | 0.0007        | 0.0001        | 0.0165                                                       | 0.0018                                                         |
| 1-Hexylcyclopentene                                   | 0.0057        | 0                     | 0.0004        | 0.0002        | 0.0101                                                       | 0.0031                                                         |
| 6-Dodecyne                                            | 0.0109        | 0                     | 0.0007        | 0.0005        | 0.0176                                                       | 0.0070                                                         |
| 1-Heptyl-1-cyclohexene                                | 0.0032        | 0                     | 0.0001        | 0.0002        | 0.0037                                                       | 0.0029                                                         |
| o-Cresol                                              | 0.0014        | 0                     | 0.0001        | 0.0000        | 0.0029                                                       | 0.0005                                                         |
| 9-Octadecen-1-ol, -(Z)-                               | 0.0337        | 0                     | 0.0002        | 0.0036        | 0.0057                                                       | 0.0499                                                         |
| 2-Pentadecanone                                       | 0.0462        | 0                     | 0.0007        | 0.0045        | 0.0167                                                       | 0.0632                                                         |
| Palmitic acid                                         | 0.0175        | 0                     | 0.0002        | 0.0018        | 0.0044                                                       | 0.0251                                                         |
| Oleic acid                                            | 0.0088        | 0                     | 0.0000        | 0.0010        | 0.0008                                                       | 0.0134                                                         |
| 1-Decylcyclohexene                                    | 0.0027        | 0                     | 0.0001        | 0.0002        | 0.0017                                                       | 0.0033                                                         |
| 3-Hexadecene                                          | 0.0234        | 0                     | 0.0006        | 0.0020        | 0.0151                                                       | 0.0282                                                         |
| 1-Nonil-CicloHexene                                   | 0.0144        | 0                     | 0.0004        | 0.0012        | 0.0109                                                       | 0.0164                                                         |
| <b>Composition of OLP in Feed<br/>(Mass Fraction)</b> |               |                       |               |               | <b>Composition of OLP<br/>in Extract<br/>(Mass Fraction)</b> | <b>Composition of OLP<br/>in Raffinate<br/>(Mass Fraction)</b> |
| <b>Hydrocarbons</b>                                   | <b>0.8924</b> | <b>0.0000</b>         | <b>0.0390</b> | <b>0.0610</b> | <b>0.9695</b>                                                | <b>0.8478</b>                                                  |
| Alkanes                                               | 0.4193        | 0.0000                | 0.0158        | 0.0313        | 0.3914                                                       | 0.4354                                                         |
| Alkenes                                               | 0.2534        | 0.0000                | 0.0147        | 0.0136        | 0.3639                                                       | 0.1895                                                         |
| Naphthenes                                            | 0.2197        | 0.0000                | 0.0086        | 0.0160        | 0.2142                                                       | 0.2229                                                         |
| <b>Oxygenates</b>                                     | <b>0.1076</b> | <b>0.0000</b>         | <b>0.0012</b> | <b>0.0109</b> | <b>0.0305</b>                                                | <b>0.1522</b>                                                  |
| Carboxylic acids                                      | 0.0263        | 0.0000                | 0.0002        | 0.0028        | 0.0052                                                       | 0.0385                                                         |
| Alcohols                                              | 0.0351        | 0.0000                | 0.0003        | 0.0036        | 0.0086                                                       | 0.0505                                                         |
| Ketones                                               | 0.0462        | 0.0000                | 0.0007        | 0.0045        | 0.0167                                                       | 0.0632                                                         |

| Composition of OLP in Feed<br>(%.area) |              |  |  |  | Recovery in Extract<br>(Mass Fraction) | Recovery in Raffinate<br>(Mass Fraction) |
|----------------------------------------|--------------|--|--|--|----------------------------------------|------------------------------------------|
| <b>Hydrocarbons</b>                    | <b>89.24</b> |  |  |  | <b>39.81</b>                           | <b>60.19</b>                             |
| Alkanes                                | 41.93        |  |  |  | 34.21                                  | 65.79                                    |
| Alkenes                                | 25.34        |  |  |  | 52.63                                  | 47.37                                    |
| Naphthenes                             | 21.97        |  |  |  | 35.73                                  | 64.27                                    |
| <b>Oxygenates</b>                      | <b>10.76</b> |  |  |  | <b>10.40</b>                           | <b>89.60</b>                             |
| Carboxylic acids                       | 2.63         |  |  |  | 7.30                                   | 92.70                                    |
| Alcohols                               | 3.51         |  |  |  | 8.94                                   | 91.06                                    |
| Ketones                                | 4.62         |  |  |  | 13.28                                  | 86.72                                    |

Table S1: Process conditions, mass flow rates, gaseous fractions, recoveries of hydrocarbons and oxygenates in extract and raffinate, as well as chemical composition, expressed in solvent-free basis, of hydrocarbons and oxygenates of OLP in feed, top and bottom streams of absorber columns T-100 by simulation of OLP deoxygenation process in multistage countercurrent absorber columns using CO<sub>2</sub> as solvent, using Aspen-HYSYS 8.6 (Aspen One, 2015) at 333 K, 140 bar, and (S/F) = 17.

| <b>ABSORBER T-102, (S/F) = 25</b>                     |               |               |               |               | <b>CO<sub>2</sub> (Free-Basis)</b>                           | <b>CO<sub>2</sub> (Free-Basis)</b>                             |
|-------------------------------------------------------|---------------|---------------|---------------|---------------|--------------------------------------------------------------|----------------------------------------------------------------|
| Streams                                               | <b>2</b>      | <b>7</b>      | <b>5</b>      | <b>6</b>      | <b>Extract</b>                                               | <b>Raffinate</b>                                               |
| Gas fraction                                          | 0.9252        | 1.0000        | 1.0000        | 0.0000        |                                                              |                                                                |
| <b>Temperature [C]</b>                                | 77.8          | 77.8          | 93.5          | 100.8         |                                                              |                                                                |
| <b>Pressure [bar]</b>                                 | 140           | 140           | 140           | 140           |                                                              |                                                                |
| Molar Flow [kgmole/h]                                 | 18.89         | 36.12         | 49.90         | 5.11          |                                                              |                                                                |
| Mass Flow [kg/h]                                      | 880.94        | 1589.72       | 2227.47       | 243.19        | <b>40.77</b>                                                 | <b>22.58</b>                                                   |
| <b>Composition of OLP<br/>(Mass Fraction)</b>         |               |               |               |               |                                                              |                                                                |
| Carbon-Dioxide                                        | 0.9281        | 1             | 0.9817        | 0.9072        | 0.0000                                                       | 0.0000                                                         |
| n-Undecane                                            | 0.0026        | 0             | 0.0010        | 0.0000        | 0.0555                                                       | 0.0001                                                         |
| n-Dodecane                                            | 0.0016        | 0             | 0.0006        | 0.0000        | 0.0335                                                       | 0.0002                                                         |
| n-Tridecane                                           | 0.0034        | 0             | 0.0013        | 0.0004        | 0.0705                                                       | 0.0039                                                         |
| n-Tetradecane                                         | 0.0075        | 0             | 0.0022        | 0.0071        | 0.1195                                                       | 0.0765                                                         |
| n-Pentadecane                                         | 0.0114        | 0             | 0.0025        | 0.0186        | 0.1346                                                       | 0.2001                                                         |
| n-Hexadecane                                          | 0.0024        | 0             | 0.0006        | 0.0028        | 0.0353                                                       | 0.0299                                                         |
| n-Heptadecane                                         | 0.0013        | 0             | 0.0002        | 0.0025        | 0.0126                                                       | 0.0269                                                         |
| n-Octadecane                                          | 0.0013        | 0             | 0.0001        | 0.0041        | 0.0038                                                       | 0.0440                                                         |
| 1-Decene                                              | 0.0005        | 0             | 0.0002        | 0.0000        | 0.0111                                                       | 0.0000                                                         |
| cis-2-Decene                                          | 0.0001        | 0             | 0.0000        | 0.0000        | 0.0013                                                       | 0.0000                                                         |
| 1-Dodecene                                            | 0.0046        | 0             | 0.0018        | 0.0000        | 0.0991                                                       | 0.0004                                                         |
| trans-2-Dodecene                                      | 0.0002        | 0             | 0.0001        | 0.0000        | 0.0041                                                       | 0.0000                                                         |
| 1-Tridecene                                           | 0.0001        | 0             | 0.0000        | 0.0000        | 0.0025                                                       | 0.0001                                                         |
| 1-Tetradecene                                         | 0.0004        | 0             | 0.0001        | 0.0002        | 0.0074                                                       | 0.0017                                                         |
| (E)-9-Octadecene                                      | 0.0006        | 0             | 0.0001        | 0.0014        | 0.0047                                                       | 0.0156                                                         |
| 1-Pentadecene                                         | 0.0004        | 0             | 0.0001        | 0.0003        | 0.0056                                                       | 0.0037                                                         |
| 1-Heptadecene                                         | 0.0032        | 0             | 0.0006        | 0.0061        | 0.0322                                                       | 0.0654                                                         |
| 1-Nonadecene                                          | 0.0008        | 0             | 0.0001        | 0.0021        | 0.0055                                                       | 0.0230                                                         |
| 1,4-Undecadiene                                       | 0.0002        | 0             | 0.0001        | 0.0000        | 0.0036                                                       | 0.0000                                                         |
| 5-Icosene                                             | 0.0001        | 0             | 0.0000        | 0.0002        | 0.0006                                                       | 0.0021                                                         |
| Isobutylcyclohexane                                   | 0.0001        | 0             | 0.0000        | 0.0000        | 0.0014                                                       | 0.0000                                                         |
| n-Butylcyclohexane                                    | 0.0001        | 0             | 0.0000        | 0.0000        | 0.0015                                                       | 0.0000                                                         |
| Cyclododecane                                         | 0.0003        | 0             | 0.0001        | 0.0001        | 0.0067                                                       | 0.0009                                                         |
| n-Decylcyclopentane                                   | 0.0052        | 0             | 0.0013        | 0.0069        | 0.0715                                                       | 0.0748                                                         |
| n-Nonylcyclopentane                                   | 0.0029        | 0             | 0.0009        | 0.0022        | 0.0497                                                       | 0.0238                                                         |
| n-Nonylcyclohexane                                    | 0.0046        | 0             | 0.0011        | 0.0064        | 0.0612                                                       | 0.0685                                                         |
| 1-Ethyl-2 heptylcyclopropane                          | 0.0002        | 0             | 0.0001        | 0.0000        | 0.0049                                                       | 0.0000                                                         |
| 1-Pentyl-2-propylcyclopropane                         | 0.0006        | 0             | 0.0002        | 0.0000        | 0.0134                                                       | 0.0000                                                         |
| 1-Butyl-1-cyclohexene                                 | 0.0001        | 0             | 0.0001        | 0.0000        | 0.0028                                                       | 0.0000                                                         |
| 1-Hexylcyclopentene                                   | 0.0002        | 0             | 0.0001        | 0.0000        | 0.0049                                                       | 0.0000                                                         |
| 6-Dodecyne                                            | 0.0005        | 0             | 0.0002        | 0.0000        | 0.0109                                                       | 0.0000                                                         |
| 1-Heptyl-1-cyclohexene                                | 0.0002        | 0             | 0.0001        | 0.0000        | 0.0043                                                       | 0.0003                                                         |
| o-Cresol                                              | 0.0000        | 0             | 0.0000        | 0.0000        | 0.0008                                                       | 0.0000                                                         |
| 9-Octadecen-1-ol,(Z)-                                 | 0.0036        | 0             | 0.0003        | 0.0102        | 0.0165                                                       | 0.1102                                                         |
| 2-Pentadecanone                                       | 0.0045        | 0             | 0.0007        | 0.0097        | 0.0402                                                       | 0.1049                                                         |
| Palmitic acid                                         | 0.0018        | 0             | 0.0002        | 0.0044        | 0.0126                                                       | 0.0476                                                         |
| Oleic acid                                            | 0.0010        | 0             | 0.0000        | 0.0031        | 0.0021                                                       | 0.0338                                                         |
| 1-Decylcyclohexene                                    | 0.0002        | 0             | 0.0001        | 0.0003        | 0.0033                                                       | 0.0033                                                         |
| 3-Hexadecene                                          | 0.0020        | 0             | 0.0005        | 0.0025        | 0.0290                                                       | 0.0267                                                         |
| 1-Nonil-CicloHexene                                   | 0.0012        | 0             | 0.0004        | 0.0011        | 0.0192                                                       | 0.0114                                                         |
| <b>Composition of OLP in Feed<br/>(Mass Fraction)</b> |               |               |               |               | <b>Composition of OLP<br/>in Extract<br/>(Mass Fraction)</b> | <b>Composition of OLP<br/>in Raffinate<br/>(Mass Fraction)</b> |
| <b>Hydrocarbons</b>                                   | <b>0.0610</b> | <b>0.0000</b> | <b>0.0170</b> | <b>0.0653</b> | <b>0.9278</b>                                                | <b>0.7034</b>                                                  |
| Alkanes                                               | 0.0313        | 0.0000        | 0.0085        | 0.0354        | 0.4653                                                       | 0.3815                                                         |
| Alkenes                                               | 0.0136        | 0.0000        | 0.0040        | 0.0129        | 0.2175                                                       | 0.1388                                                         |
| Naphthenes                                            | 0.0160        | 0.0000        | 0.0045        | 0.0170        | 0.2449                                                       | 0.1831                                                         |
| <b>Oxygenates</b>                                     | <b>0.0109</b> | <b>0.0000</b> | <b>0.0013</b> | <b>0.0275</b> | <b>0.0722</b>                                                | <b>0.2966</b>                                                  |
| Carboxylic acids                                      | 0.0028        | 0.0000        | 0.0003        | 0.0076        | 0.0147                                                       | 0.0814                                                         |
| Alcohols                                              | 0.0036        | 0.0000        | 0.0003        | 0.0102        | 0.0174                                                       | 0.1102                                                         |
| Ketones                                               | 0.0045        | 0.0000        | 0.0007        | 0.0097        | 0.0402                                                       | 0.1049                                                         |

| Composition of OLP in Feed<br>(%.area) |              |  |  |  | Recovery in Extract<br>(Mass Fraction) | Recovery in Raffinate<br>(Mass Fraction) |
|----------------------------------------|--------------|--|--|--|----------------------------------------|------------------------------------------|
| <b>Hydrocarbons</b>                    | <b>53.71</b> |  |  |  | <b>70.43</b>                           | <b>29.57</b>                             |
| Alkanes                                | 27.58        |  |  |  | 68.77                                  | 31.23                                    |
| Alkenes                                | 12.00        |  |  |  | 73.89                                  | 26.11                                    |
| Naphthenes                             | 14.12        |  |  |  | 70.73                                  | 29.27                                    |
| <b>Oxygenates</b>                      | <b>9.64</b>  |  |  |  | <b>30.55</b>                           | <b>69.45</b>                             |
| Carboxylic acids                       | 2.44         |  |  |  | 24.60                                  | 75.40                                    |
| Alcohols                               | 3.19         |  |  |  | 22.15                                  | 77.85                                    |
| Ketones                                | 4.00         |  |  |  | 40.87                                  | 59.13                                    |

Table S2: Process conditions, mass flow rates, gaseous fractions, recoveries of hydrocarbons and oxygenates in extract and raffinate, as well as chemical composition, expressed in solvent-free basis, of hydrocarbons and oxygenates of OLP in feed, top and bottom streams of absorber columns T-102 by simulation of OLP deoxygenation process in multistage countercurrent absorber columns using CO<sub>2</sub> as solvent, using Aspen-HYSYS 8.6 (Aspen One, 2015) at 350 K, 140 bar, and (S/F) = 25.

| <b>ABSORBER T-101, (S/F) = 38</b>                     |               |               |               |               | <b>CO<sub>2</sub> (Free-Basis)</b>                           | <b>CO<sub>2</sub> (Free-Basis)</b>                             |
|-------------------------------------------------------|---------------|---------------|---------------|---------------|--------------------------------------------------------------|----------------------------------------------------------------|
| Streams                                               | <b>19</b>     | <b>20</b>     | <b>21</b>     | <b>22</b>     | <b>Extract</b>                                               | <b>Raffinate</b>                                               |
| Gas fraction                                          | 0.0000        | 1.0000        | 1.0000        | 0.0000        |                                                              |                                                                |
| <b>Temperature [C]</b>                                | 60.0          | 60.0          | 101.1         | 67.2          |                                                              |                                                                |
| <b>Pressure [bar]</b>                                 | 140           | 140           | 140           | 140           |                                                              |                                                                |
| Molar Flow [kgmole/h]                                 | 0.10          | 12.81         | 7.01          | 5.90          |                                                              |                                                                |
| Mass Flow [kg/h]                                      | 22.71         | 563.86        | 311.94        | 274.62        | <b>4.07</b>                                                  | <b>18.49</b>                                                   |
| <b>Composition of OLP<br/>(Mass Fraction)</b>         |               |               |               |               |                                                              |                                                                |
| Carbon-Dioxide                                        | 0.0065        | 1             | 0.9869        | 0.9327        | 0.0000                                                       | 0.0000                                                         |
| n-Undecane                                            | 0.0001        | 0             | 0.0000        | 0.0000        | 0.0005                                                       | 0.0001                                                         |
| n-Dodecane                                            | 0.0002        | 0             | 0.0000        | 0.0000        | 0.0007                                                       | 0.0001                                                         |
| n-Tridecane                                           | 0.0038        | 0             | 0.0001        | 0.0002        | 0.0108                                                       | 0.0023                                                         |
| n-Tetradecane                                         | 0.0758        | 0             | 0.0016        | 0.0044        | 0.1232                                                       | 0.0660                                                         |
| n-Pentadecane                                         | 0.1987        | 0             | 0.0029        | 0.0132        | 0.2187                                                       | 0.1959                                                         |
| n-Hexadecane                                          | 0.0296        | 0             | 0.0006        | 0.0018        | 0.0451                                                       | 0.0265                                                         |
| n-Heptadecane                                         | 0.0267        | 0             | 0.0003        | 0.0018        | 0.0250                                                       | 0.0273                                                         |
| n-Octadecane                                          | 0.0438        | 0             | 0.0001        | 0.0035        | 0.0082                                                       | 0.0520                                                         |
| 1-Decene                                              | 0.0000        | 0             | 0.0000        | 0.0000        | 0.0000                                                       | 0.0000                                                         |
| cis-2-Decene                                          | 0.0000        | 0             | 0.0000        | 0.0000        | 0.0000                                                       | 0.0000                                                         |
| 1-Dodecene                                            | 0.0004        | 0             | 0.0000        | 0.0000        | 0.0015                                                       | 0.0002                                                         |
| trans-2-Dodecene                                      | 0.0000        | 0             | 0.0000        | 0.0000        | 0.0001                                                       | 0.0000                                                         |
| 1-Tridecene                                           | 0.0001        | 0             | 0.0000        | 0.0000        | 0.0003                                                       | 0.0001                                                         |
| 1-Tetradecene                                         | 0.0017        | 0             | 0.0000        | 0.0001        | 0.0037                                                       | 0.0012                                                         |
| (E)-9-Octadecene                                      | 0.0155        | 0             | 0.0001        | 0.0011        | 0.0105                                                       | 0.0167                                                         |
| 1-Pentadecene                                         | 0.0037        | 0             | 0.0001        | 0.0002        | 0.0062                                                       | 0.0032                                                         |
| 1-Heptadecene                                         | 0.0650        | 0             | 0.0008        | 0.0044        | 0.0629                                                       | 0.0660                                                         |
| 1-Nonadecene                                          | 0.0229        | 0             | 0.0002        | 0.0017        | 0.0129                                                       | 0.0252                                                         |
| 1,4-Undecadiene                                       | 0.0000        | 0             | 0.0000        | 0.0000        | 0.0000                                                       | 0.0000                                                         |
| 5-Icosene                                             | 0.0021        | 0             | 0.0000        | 0.0002        | 0.0013                                                       | 0.0023                                                         |
| Isobutylcyclohexane                                   | 0.0000        | 0             | 0.0000        | 0.0000        | 0.0000                                                       | 0.0000                                                         |
| n-Butylcyclohexane                                    | 0.0000        | 0             | 0.0000        | 0.0000        | 0.0000                                                       | 0.0000                                                         |
| Cyclododecane                                         | 0.0008        | 0             | 0.0000        | 0.0000        | 0.0021                                                       | 0.0006                                                         |
| n-Decylcyclopentane                                   | 0.0744        | 0             | 0.0014        | 0.0046        | 0.1039                                                       | 0.0684                                                         |
| n-Nonylcyclopentane                                   | 0.0236        | 0             | 0.0006        | 0.0013        | 0.0439                                                       | 0.0193                                                         |
| n-Nonylcyclohexane                                    | 0.0681        | 0             | 0.0012        | 0.0043        | 0.0922                                                       | 0.0633                                                         |
| 1-Ethyl-2 heptylcyclopropane                          | 0.0000        | 0             | 0.0000        | 0.0000        | 0.0001                                                       | 0.0000                                                         |
| 1-Pentyl-2-propylcyclopropane                         | 0.0000        | 0             | 0.0000        | 0.0000        | 0.0000                                                       | 0.0000                                                         |
| 1-Butyl-1-cyclohexene                                 | 0.0000        | 0             | 0.0000        | 0.0000        | 0.0000                                                       | 0.0000                                                         |
| 1-Hexylcyclopentene                                   | 0.0000        | 0             | 0.0000        | 0.0000        | 0.0000                                                       | 0.0000                                                         |
| 6-Dodecyne                                            | 0.0000        | 0             | 0.0000        | 0.0000        | 0.0002                                                       | 0.0000                                                         |
| 1-Heptyl-1-cyclohexene                                | 0.0003        | 0             | 0.0000        | 0.0000        | 0.0008                                                       | 0.0002                                                         |
| o-Cresol                                              | 0.0000        | 0             | 0.0000        | 0.0000        | 0.0000                                                       | 0.0000                                                         |
| 9-Octadecen-1-ol, -(Z)-                               | 0.1096        | 0             | 0.0005        | 0.0085        | 0.0412                                                       | 0.1255                                                         |
| 2-Pentadecanone                                       | 0.1043        | 0             | 0.0011        | 0.0074        | 0.0849                                                       | 0.1094                                                         |
| Palmitic acid                                         | 0.0473        | 0             | 0.0004        | 0.0035        | 0.0304                                                       | 0.0514                                                         |
| Oleic acid                                            | 0.0336        | 0             | 0.0001        | 0.0027        | 0.0050                                                       | 0.0402                                                         |
| 1-Decylcyclohexene                                    | 0.0033        | 0             | 0.0001        | 0.0002        | 0.0047                                                       | 0.0030                                                         |
| 3-Hexadecene                                          | 0.0265        | 0             | 0.0005        | 0.0016        | 0.0392                                                       | 0.0239                                                         |
| 1-Nonil-CicloHexene                                   | 0.0113        | 0             | 0.0003        | 0.0006        | 0.0197                                                       | 0.0096                                                         |
| <b>Composition of OLP in Feed<br/>(Mass Fraction)</b> |               |               |               |               | <b>Composition of OLP<br/>in Extract<br/>(Mass Fraction)</b> | <b>Composition of OLP<br/>in Raffinate<br/>(Mass Fraction)</b> |
| <b>Hydrocarbons</b>                                   | <b>0.6987</b> | <b>0.0000</b> | <b>0.0109</b> | <b>0.0453</b> | <b>0.8385</b>                                                | <b>0.6734</b>                                                  |
| Alkanes                                               | 0.3789        | 0.0000        | 0.0056        | 0.0249        | 0.4321                                                       | 0.3701                                                         |
| Alkenes                                               | 0.1380        | 0.0000        | 0.0018        | 0.0093        | 0.1389                                                       | 0.1389                                                         |
| Naphthenes                                            | 0.1818        | 0.0000        | 0.0035        | 0.0111        | 0.2674                                                       | 0.1644                                                         |
| <b>Oxygenates</b>                                     | <b>0.2948</b> | <b>0.0000</b> | <b>0.0021</b> | <b>0.0220</b> | <b>0.1615</b>                                                | <b>0.3266</b>                                                  |
| Carboxylic acids                                      | 0.0810        | 0.0000        | 0.0005        | 0.0062        | 0.0354                                                       | 0.0916                                                         |
| Alcohols                                              | 0.1096        | 0.0000        | 0.0005        | 0.0085        | 0.0412                                                       | 0.1255                                                         |
| Ketones                                               | 0.1043        | 0.0000        | 0.0011        | 0.0074        | 0.0849                                                       | 0.1094                                                         |

| Composition of OLP in Feed<br>(%.area) |              |  |  |  | Recovery in Extract<br>(Mass Fraction) | Recovery in Raffinate<br>(Mass Fraction) |
|----------------------------------------|--------------|--|--|--|----------------------------------------|------------------------------------------|
| <b>Hydrocarbons</b>                    | <b>15.86</b> |  |  |  | <b>21.53</b>                           | <b>78.47</b>                             |
| Alkanes                                | 8.60         |  |  |  | 20.46                                  | 79.54                                    |
| Alkenes                                | 3.13         |  |  |  | 18.06                                  | 81.94                                    |
| Naphthenes                             | 4.13         |  |  |  | 26.38                                  | 73.62                                    |
| <b>Oxygenates</b>                      | <b>6.69</b>  |  |  |  | <b>9.83</b>                            | <b>90.17</b>                             |
| Carboxylic acids                       | 1.84         |  |  |  | 7.85                                   | 92.15                                    |
| Alcohols                               | 2.49         |  |  |  | 6.74                                   | 93.26                                    |
| Ketones                                | 2.37         |  |  |  | 14.61                                  | 85.39                                    |

Table S3: Process conditions, mass flow rates, gaseous fractions, recoveries of hydrocarbons and oxygenates in extract and raffinate, as well as chemical composition, expressed in solvent-free basis, of hydrocarbons and oxygenates of OLP in feed, top and bottom streams of absorber columns T-101 by simulation of OLP deoxygenation process in multistage countercurrent absorber columns using CO<sub>2</sub> as solvent, using Aspen-HYSYS 8.6 (Aspen One, 2015) at 333 K, 140 bar, and (S/F) = 38.
